# Supplementary material
Source: ML conference proceedings conference paper supplement (https://openaccess.thecvf.com/content/ICCV2021/html/Graham_LeViT_A_Vision_ICCV_2021_paper.html)
Supplement: Supplementary file 1 [file Graham_LeViT_A_Vision_ICCV_2021_supplemental.zip]

# Supplementary material for LeViT: a Vision Transformer in ConvNet’s Clothing for Faster Inference

In this supplementary material, we report details and results that did not fit in the main paper:

Appendix A details the timings of constituent block and provides more details about our ablation. We provide visualizations of the attention bias in Appendix B.

## A. Detailed analysis

### A.1. Block timings

In this section we compare the differences in design between DeiT and LeViT blocks from the perspective of a detailed runtime analysis. We measure the runtime of their constituent parts side-by-side in the supplementary Table 1. For DeiT-Tiny, we replace the GELU activation with Hardswish, as otherwise it dominates the runtime.

For DeiT, we consider a block from DeiT-tiny. For LeViT, we consider a block from the first stage of LeViT-256. Both operate at resolution  $14 \times 14$  and have comparable run times, although LeViT is 33% wider ( $C = 256$  vs  $C = 192$ ). Note that stage 1 is the most expensive part of LeViT-256. In stages 2 and 3, the cost is lower due to the reduction in resolution (see Figure 4 of the main paper).

LeViT spends less time calculating the attention  $QK^T$ , but more time on the subsequent matrix product  $AV$ . Despite having the larger block width  $C$ , LeViT spends less time on the MLP component as the expansion factor is halved from four to two.

### A.2. More details on our ablation

Here we give additional details of the ablation experiments in Section 5.6 and Table 4 of the main paper.

**A1 – without pyramid shape.** We test the effect of the LeViT pyramid structure, we replace the three stages with a single stage of depth 11 at resolution  $14 \times 14$ . To preserve the FLOP count, we take  $D = 19$ ,  $N = 3$  and  $C = 2ND = 114$ .

**A6 – without wider blocks.** Compared to DeiT, LeViT blocks are relatively wide given the number of FLOPs, with smaller keys and MLP expansion factors. To test this change we modify LeViT-128S to have more traditional blocks while preserving the number of FLOPs. We therefore take  $Q, K, V$  to all have dimension  $D = 30$ , and

Table 1. Timings for the components of the LeViT architecture on an Intel Xeon E5-2698 CPU core with batch size 1.

| Model                  | DeiT-tiny          | LeViT-256          |
|------------------------|--------------------|--------------------|
|                        | $C = 192$          | $C = 256$          |
| Dimensions             | $N = 3$            | $N = 4$            |
|                        | $D = 64$           | $D = 32$           |
| Component              | Runtime ( $\mu$ s) | Runtime ( $\mu$ s) |
| LayerNorm              | 49                 | n/a                |
| Keys $Q, K$            | 299                | 275                |
| Values $V$             | 172                | 275                |
| Product $QK^T$         | 228                | 159                |
| Product Attention $AV$ | 161                | 206                |
| Attention projection   | 175                | 310                |
| MLP                    | 1390               | 1140               |
| Total                  | 2474               | 2365               |

$C = ND = 120, 180, 240$  for the three stages. As in DeiT, the MLP expansion ratio is 4. In the subsampling layers we use  $N = 4C/D = 16, 24$ , respectively.

## B. Visualizations: attention bias

The attention bias maps from Eqn. 1 in the main paper are just two-dimensional maps. Therefore we can visualize them, see Figure 1. They can be read as the amount of attention between two pixels that are at a certain relative position. The lowest values of the bias are low enough (-20) to suppress the attention between the two pixels, since they are input to a softmax.

We can observe that some heads are quite uniform, while other heads specialize in nearby pixels (*e.g.* most heads of the shrinking attention). Some are clearly directional, *e.g.* heads 1 and 4 of Stage 2/block 1 handle the pixels adjacent vertically and horizontally (respectively). Head 1 of stage 2, block 4 has a specific period-2 pattern that may be due to the fact that its output is fed to a sub-sampling filter in the next shrinking attention block.

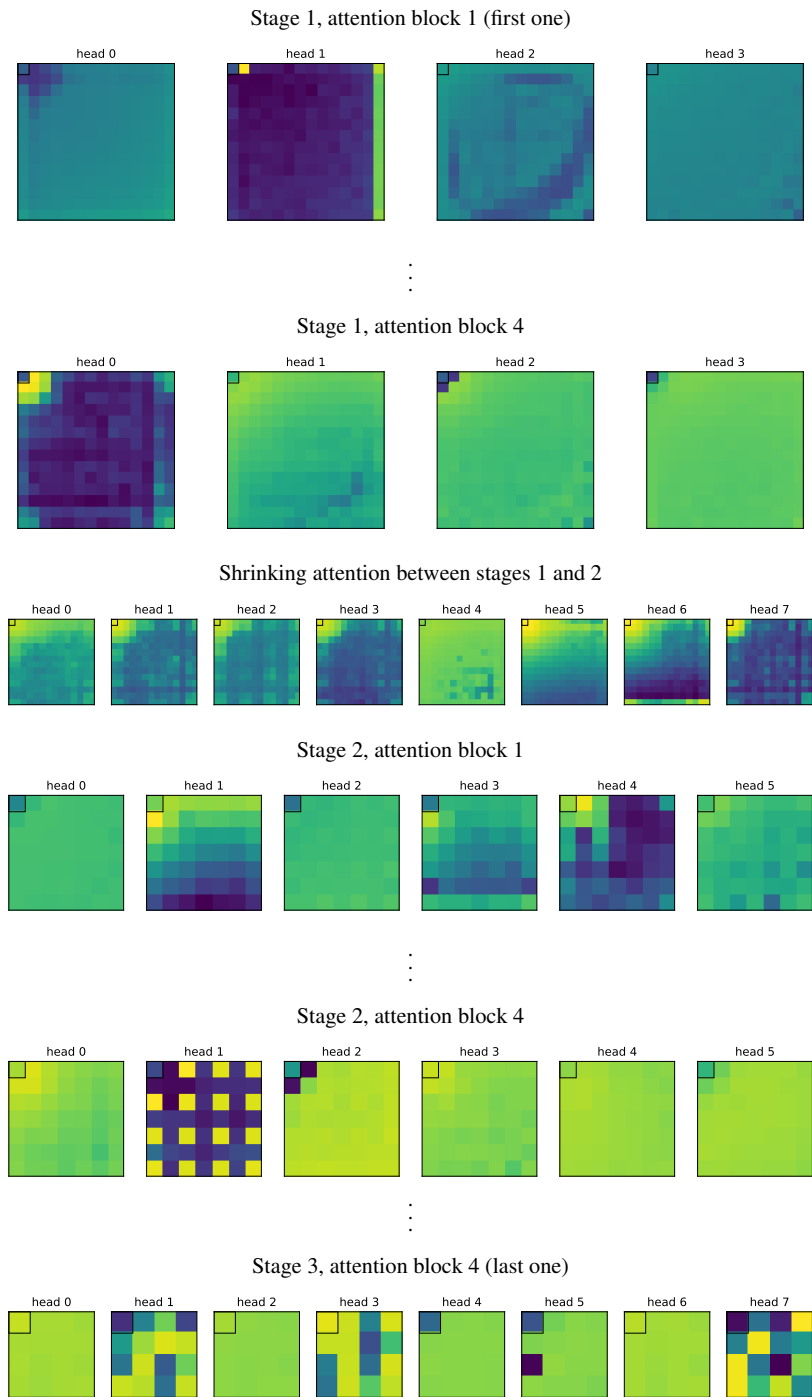

Figure 1. Visualization of the attention bias for several blocks of a trained LeViT-256 model. The center for which the attention is computed is the upper left pixel of the map (with a square). Higher bias values are in yellow, lower values in dark blue (values range from -20 to 7).
